# Supplementary material for: El traje nuevo del emperador. Reformas y elecciones en Egipto
Source: Royal Society of Chemistry journal article supplement (doi:10.1039/d4tb01032a), 2006-01-01
Supplement: d4tb01032a1.pdf [file d4tb01032a1.pdf]

## Supplementary materials

### **Mercaptoimidazole-capped gold nanoparticles as a potent agent against plant pathogenic fungi**

Tang Xu <sup>a, b, d, 1</sup>, Wenshuai Hao <sup>c, 1</sup>, Ran Du <sup>b, 1</sup>, Dai Dai <sup>e</sup>, Cuixia Wang <sup>a</sup>, Suhua Li <sup>b</sup>,  
Carol Sze Ki Lin <sup>f</sup>, Ruitao Cha <sup>c, \*</sup>, Jianbin Yan <sup>b, \*</sup>, Chong Li <sup>a, \*</sup>

<sup>a</sup> Kunpeng Institute of Modern Agriculture at Foshan, Shenzhen Branch, Guangdong Laboratory of Lingnan Modern Agriculture, Agricultural Genomics Institute at Shenzhen, Chinese Academy of Agricultural Sciences, Shenzhen, China

<sup>b</sup> Shenzhen Branch, Guangdong Laboratory for Lingnan Modern Agriculture, Shenzhen Key Laboratory of Agricultural Synthetic Biology, Genome Analysis Laboratory of the Ministry of Agriculture and Rural Affairs, Agricultural Genomics Institute at Shenzhen, Chinese Academy of Agricultural Sciences, Shenzhen, China

<sup>c</sup> Laboratory of Theoretical and Computational Nanoscience, CAS Center for Excellence in Nanoscience, National Center for Nanoscience and Technology, Beijing 100190, China

<sup>d</sup> School of Life Sciences, Henan University, Kaifeng 475004, China

<sup>e</sup> Department of Environmental Systems Science, ETH Zürich, Zurich 8092, Switzerland

<sup>f</sup> School of Energy and Environment, City University of Hong Kong, Hong Kong, China

\* Corresponding authors: Chong Li, Jianbin Yan, Ruitao Cha

E-mail addresses: lichonglx@caas.cn (C. Li), jianbinlab@caas.cn (J. Yan), chart@nanoctr.cn (R. Cha)

<sup>1</sup> These authors made equal contribution.

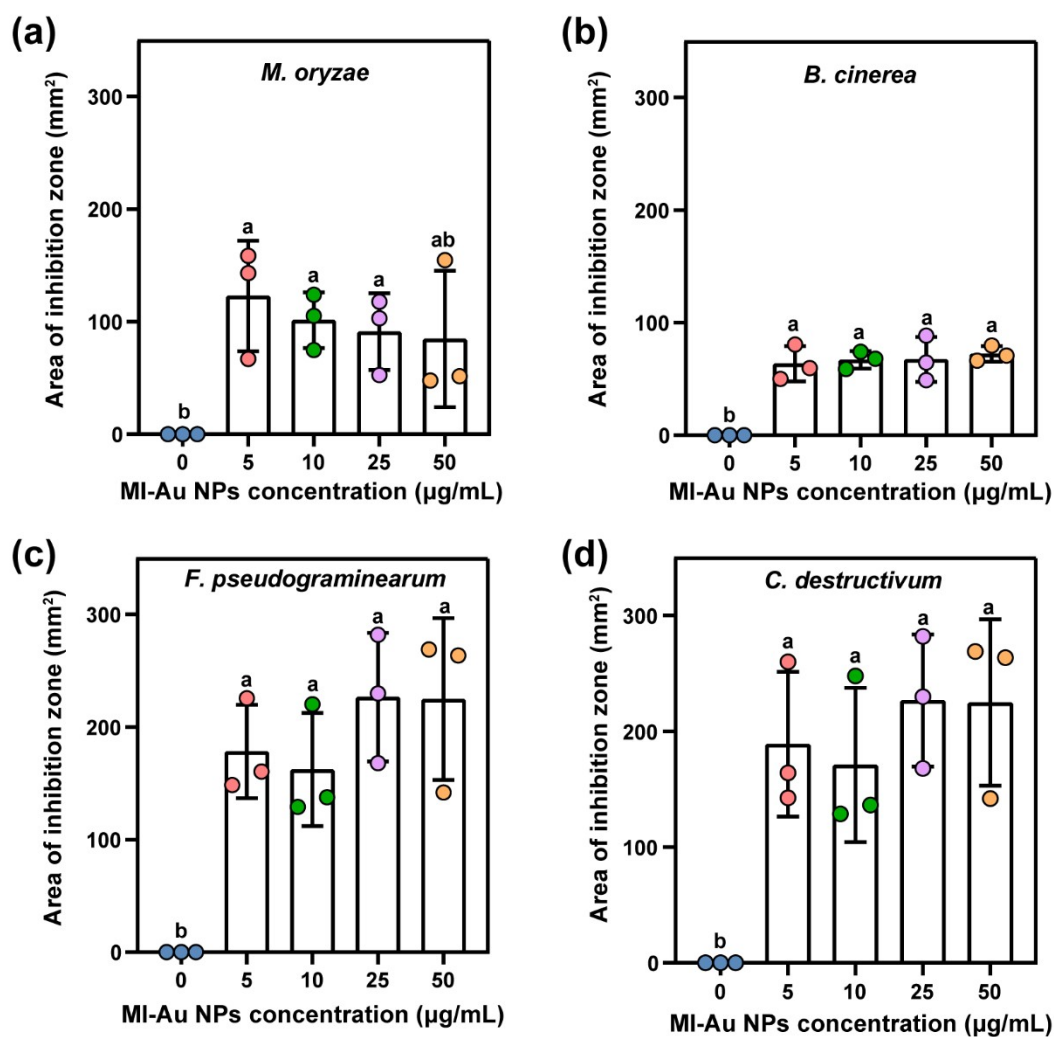

31  
 32 **Figure S1.** Inhibition zone area of fungi by MI-Au NPs treatment. (a) *M. oryzae*. (b) *B.*  
 33 *cinerea*. (c) *F. pseudograminearum*. (d) *C. destructivum*. Different lowercase letters  
 34 denote statistically significant difference ( $p < 0.05$ ) between bars. Error bars indicate  
 35 standard deviation of the mean.

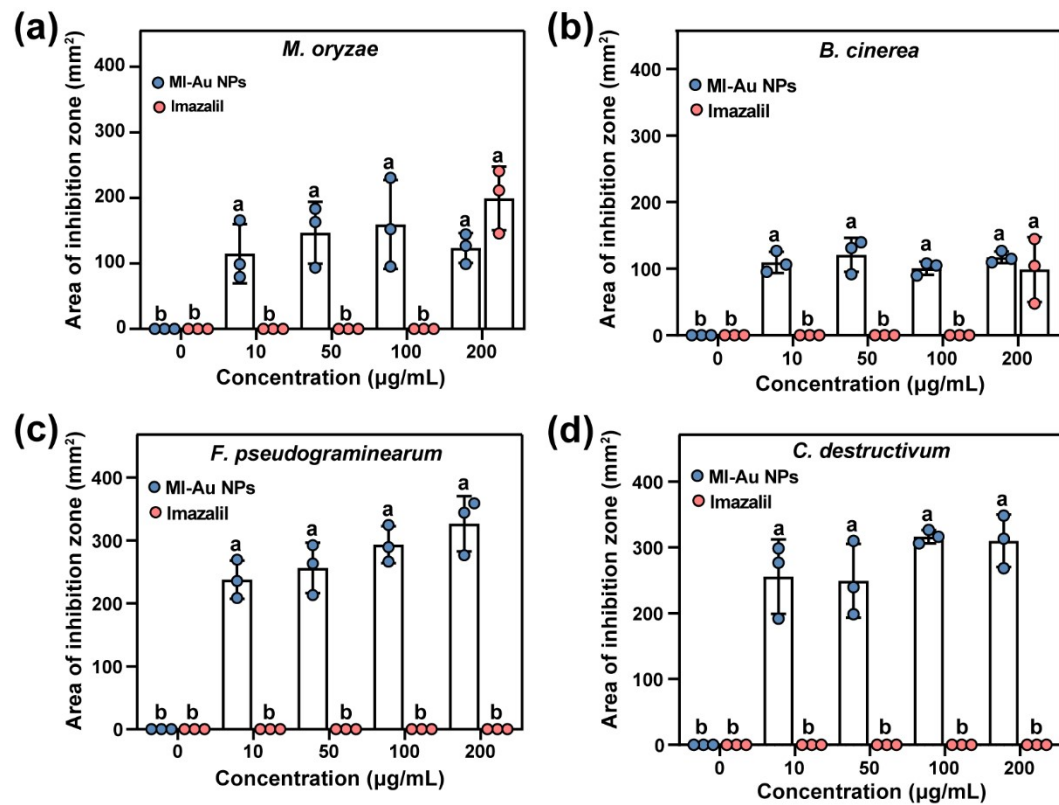

36

37 **Figure S2.** Inhibition zone area of fungi by MI-Au NPs or imazalil treatment. (a) *M.*  
 38 *oryzae*. (b) *B. cinerea*. (c) *F. pseudograminearum*. (d) *C. destructivum*. Different  
 39 lowercase letters denote statistically significant difference (p < 0.05) between bars.  
 40 Error bars indicate standard deviation of the mean.

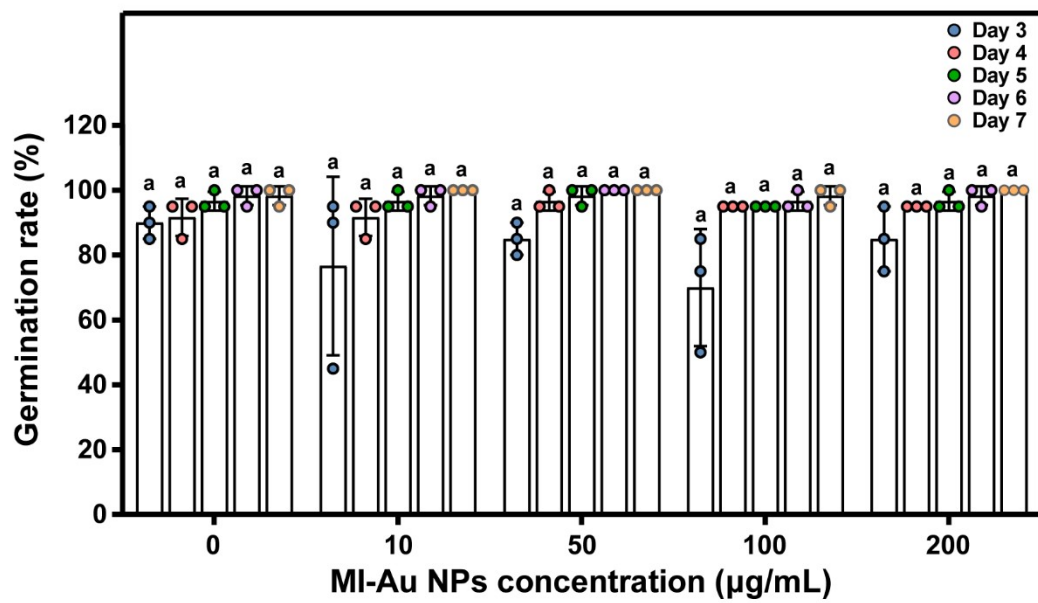

42

43 **Figure S3.** Germination rates of *S. lycopersicum* seeds in 7 days. Different lowercase  
 44 letters denote statistically significant difference ( $p < 0.05$ ) between bars. Error bars  
 45 indicate standard deviation of the mean.
